# Supplementary material for: Fabrication of Textile-Based Dry Electrode and Analysis of Its Surface EMG Signal for Applying Smart Wear
Source: MDPI journal article supplement (doi:10.3390/polym14173641), 2022-09-02
Supplement: s1 [file s1]

## <Supplementary Materials>

# Fabrication of Textile-Based Dry Electrode and Analysis of its Surface EMG Signal for Applying Smart Wear

Hyelim Kim<sup>1</sup>, Soohyeon Rho<sup>1,2</sup>, Sora Han<sup>1</sup>, Daeyoung Lim,<sup>1</sup> and Wonyoung Jeong<sup>1,\*</sup>

<sup>1</sup> Material and Component Convergence R&D Department, Korea Institute of Industrial Technology (KITECH), Ansan 15588, Gyeonggi-do, Korea

<sup>2</sup> Department of Nano Science and Technology, Sungkyunkwan University, Suwon 16419, Gyeonggi-do, Korea

\* Correspondence: wyjeong@kitech.re.kr

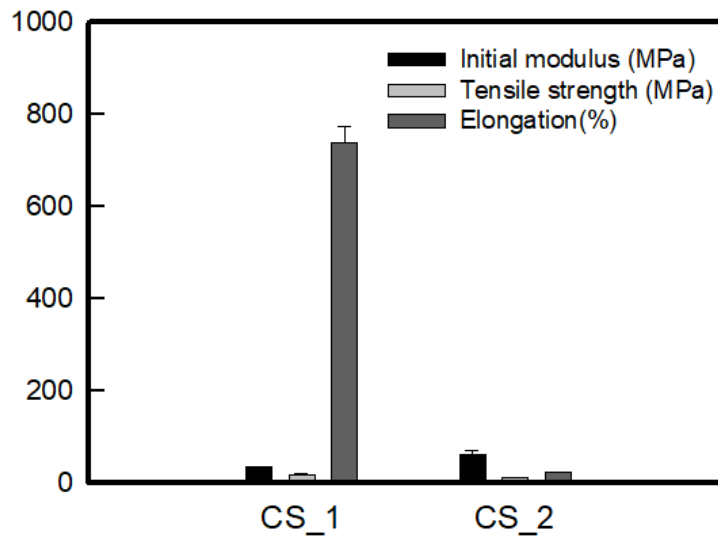

**Figure S1.** Tensile properties of two types of conductive sheet.

Figure S1 shows the tensile properties of two types of conductive sheets. The initial modulus of CS\_1 was  $34.5 \pm 1.0$  MPa, the tensile strength was  $19.5 \pm 2.7$  MPa, and the elongation at break was  $737.3 \pm 37.1$  %. Initial modulus, tensile strength, and elongation at break of CS\_2 are each  $61.6 \pm 8.4$  MPa,  $12.8 \pm 0.6$  MPa, and  $23.3 \pm 0.4$  %. Accordingly, while the initial modulus of CS\_1 was lower than that of CS\_2, the tensile strength and elongation at break were 1.5 times and 32 times higher, respectively. Accordingly, CS\_1 was found to be a flexible yet strong material. As the flexibility and elongation increases, the deformation occurs more easily, so in the case of CS\_1, it is expected that it will affect the durability of the electrode part in smart wear, which is frequently worn on and off.

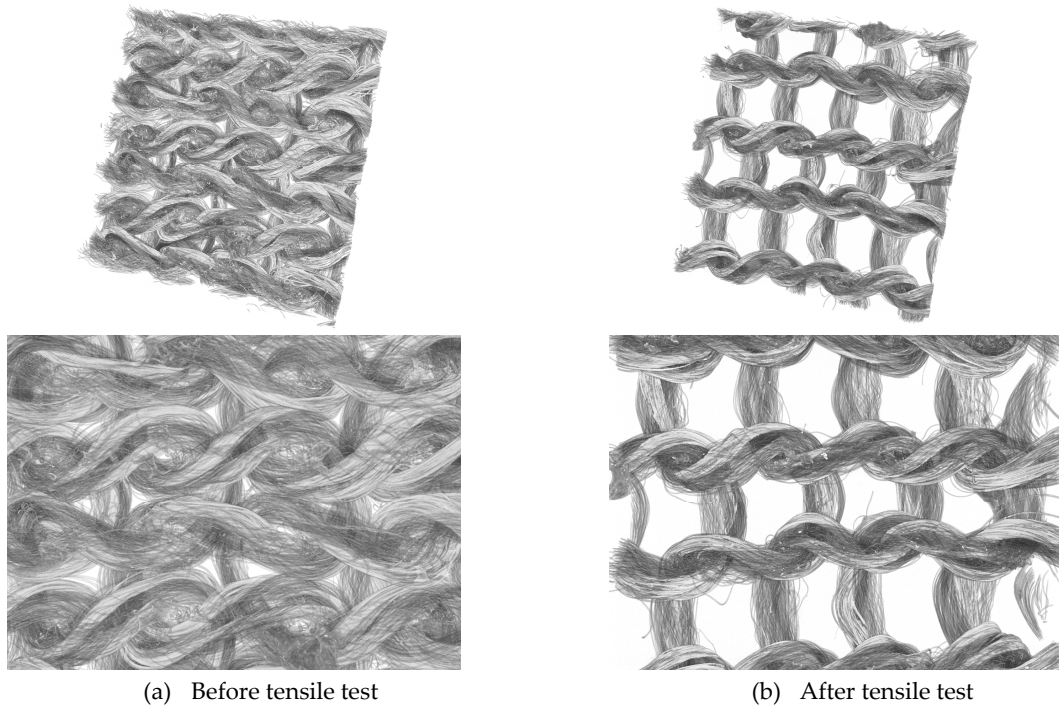

**Figure S2.** 3D image of knitted electrode of plain structure (a) before and (b) after tensile test.

**Figure S2** confirms the structural change after 80% elongated using X-ray microscopy to confirm the morphological change of the knitted electrode of plain structure that varies before and after wearing. At this time, three loops were selected and analyzed to compare the change in loop length. The loop before tension was 2.21 mm and 1.44 mm in the wale and course directions, respectively. After tensioning, the loops were 2.18 mm and 1.76 mm in each direction. Accordingly, the strains in the wale and course directions are -1.18% and 18.1%, respectively. As the sample increases by about 20% in the transverse direction, it is expected that the EMG signal collection will be affected.
